# Supplementary material
Source: ML conference proceedings conference paper supplement (https://openaccess.thecvf.com/content/CVPR2026/html/Wang_DDT_Decoupled_Diffusion_CVPR_2026_paper.html)
Supplement: Supplementary file 1 [file Wang_DDT_Decoupled_Diffusion_CVPR_2026_supplemental.pdf]

## A. Model Specs

| Config | #Layers | Hidden dim | #Heads |
|--------|---------|------------|--------|
| B/2    | 12      | 768        | 12     |
| L/2    | 24      | 1024       | 16     |
| XL/2   | 28      | 1152       | 16     |

## B. Hyper-parameters

| VAE                           | SD-VAE-f8d4-ft-ema |
|-------------------------------|--------------------|
| VAE donwsample latent channel | 8<br>4             |
| optimizer                     | AdamW [3]          |
| base learning rate            | 1e-4               |
| weight decay                  | 0.0                |
| batch size                    | 256                |
| learning rate schedule        | constant           |
| augmentation                  | center crop        |
| diffusion sampler             | Euler-ODE          |
| diffusion steps               | 250                |
| evaluation suite              | ADM [2]            |

## C. Pixel Space Class-to-Image Experiments.

We conduct pixel C2I on ImageNet  $64 \times 64$  to assess the generalization capability. Following standard practice, we use a patch size of 4, our DDT-XL/4 achieved 2.11 FID.

## D. Pixel Space Text-to-Image Experiments.

We conduct pixel space T2I without VAE on a publicly collected dataset of 20M images (SAM, CC12M, and JourneyDB). Using a large patch size of 16 for efficiency, our PixDDT-XXL/16 (1.2B Params) trained on  $256 \times 256$  size achieves an overall score 54.7 on the GenEval Benchmark—improving to 65.7 with prompt rewriting (higher efficiency and better than recent PixelFlow).

## E. Linear flow and Diffusion

Given the SDE forward and reverse process:

$$d\mathbf{x}_t = f(t)\mathbf{x}_t dt + g(t)d\mathbf{w} \quad (1)$$

$$d\mathbf{x}_t = [f(t)\mathbf{x}_t - g(t)^2 \nabla_{\mathbf{x}} \log p(\mathbf{x}_t)] dt + g(t)d\mathbf{w} \quad (2)$$

A corresponding deterministic process exists with trajectories sharing the same marginal probability densities of reverse SDE.

$$d\mathbf{x}_t = [f(t)\mathbf{x}_t - \frac{1}{2}g(t)^2 \nabla_{\mathbf{x}} \log p(\mathbf{x}_t)] dt \quad (3)$$

Given  $x_t = \alpha_t x_{data} + \sigma \epsilon$ . The traditional diffusion model learns:

$$\nabla_{\mathbf{x}_t} \log p(\mathbf{x}_t) = -\frac{\epsilon}{\sigma(t)} \quad (4)$$

The flow-matching framework actually learns the following:

$$\mathbf{v}_t = \dot{\alpha}x + \dot{\sigma}\epsilon \quad (5)$$

$$= x - \epsilon \quad (6)$$

Here we will demonstrate in flow-matching, the  $\mathbf{v}_t$  prediction is actually as same as the reverse ode:

$$\dot{\alpha}x + \dot{\sigma}\epsilon \quad (7)$$

$$= f(t)\mathbf{x}_t - \frac{1}{2}g(t)^2 \nabla_{\mathbf{x}_t} \log p(\mathbf{x}_t) \quad (8)$$

Let us start by expanding the reverse ode first.

$$f(t)\mathbf{x}_t - \frac{1}{2}g(t)^2 \nabla_{\mathbf{x}_t} \log p(\mathbf{x}_t) \quad (9)$$

$$= f(t)(\alpha(t)\mathbf{x}_{data} + \sigma(t)\epsilon) - \frac{1}{2}g(t)^2 \left[-\frac{\epsilon}{\sigma(t)}\right] \quad (10)$$

$$= f(t)\alpha(t)\mathbf{x}_{data} + (f(t)\sigma(t) + \frac{1}{2}\frac{g(t)^2}{\sigma(t)})\epsilon \quad (11)$$

To prove Eq. (8), we needs to demonstrate that:

$$\dot{\alpha}(t) = f_t \alpha(t) \quad (12)$$

$$\dot{\sigma}(t) = f_t \sigma(t) + \frac{1}{2}\frac{g_t^2}{\sigma(t)}. \quad (13)$$

Here, let us derive the relation between  $f_t$  and  $\alpha(t)$ ,  $\dot{\alpha}(t)$ . We donate  $x_{data}(t) = \alpha(t)x_{data}$  is the remain component of  $x_{data}$  in  $x_t$ , it is easy to find that:

$$d\mathbf{x}_{data}(t) = f_t \mathbf{x}_{data}(t) dt \quad (14)$$

$$d(\alpha(t)\mathbf{x}_{data}) = f_t \alpha(t)\mathbf{x}_{data} dt \quad (15)$$

$$d\alpha(t) = f_t \alpha(t) dt \quad (16)$$

So, Eq. (12) is right.

Based on the above equation, we will demonstrate the relation of  $g_t$ ,  $f_t$  with  $\sigma(t)$ . Note that Gaussian noise has nice additive properties.

$$a\epsilon_1 + b\epsilon_2 \in \mathcal{N}(0, \sqrt{a^2 + b^2}) \quad (17)$$

Let us start with the gaussian noise component  $\epsilon(t)$  calculation, reaching at  $t$ , every noise addition at  $s \in [0, t]$  while been decayed by a factor of  $\frac{\alpha(t)}{\alpha(s)}$ . Thus, the mixed Gaussian noise will have a std variance  $\sigma(t)$  of:

$$\sigma(t) = \sqrt{\left(\int_0^t \left[\left(\frac{\alpha(t)}{\alpha(s)}\right)^2 g_s^2\right] ds\right)} \quad (18)$$

$$\sigma(t) = \alpha(t) \sqrt{\left(\int_0^t \left[\left(\frac{g_s}{\alpha(s)}\right)^2\right] ds\right)} \quad (19)$$

After obtaining the relation of  $f_t, g_t$  and  $\alpha(t), \sigma(t)$ , we derive  $\dot{\alpha}(t)$  and  $\dot{\sigma}(t)$  with above conditions:

$$\dot{\alpha}(t) = f_t \exp\left[\int_0^t f_s ds\right] \quad (20)$$

$$\dot{\alpha}(t) = f_t \alpha(t) \quad (21)$$

As for  $\dot{\sigma}(t)$ , it is quit complex but not hard:

$$\dot{\sigma}(t) = \dot{\alpha}(t) \sqrt{\left(\int_0^t \left[\left(\frac{g_t}{\alpha(s)}\right)^2\right] ds\right)} + \alpha(t) \frac{\frac{1}{2} \frac{g_t^2}{\alpha(t)}}{\sqrt{\left(\int_0^t \left[\left(\frac{g_t}{\alpha(s)}\right)^2 g_s^2\right] ds\right)}} \quad (22)$$

$$\dot{\sigma}(t) = (f_t \alpha(t)) \sqrt{\left(\int_0^t \left[\left(\frac{g_t}{\alpha(s)}\right)^2\right] ds\right)} + \alpha(t) \frac{\frac{1}{2} \frac{g_t^2}{\alpha^2(t)}}{\sqrt{\left(\int_0^t \left[\left(\frac{g_t}{\alpha(s)}\right)^2\right] ds\right)}} \quad (23)$$

$$\dot{\sigma}(t) = f_t \alpha(t) \sqrt{\left(\int_0^t \left[\left(\frac{g_t}{\alpha(s)}\right)^2\right] ds\right)} + \frac{\frac{1}{2} g_t^2}{\alpha(t) \sqrt{\left(\int_0^t \left[\left(\frac{g_t}{\alpha(s)}\right)^2\right] ds\right)}} \quad (24)$$

$$\dot{\sigma}(t) = f_t \sigma(t) + \frac{1}{2} \frac{g_t}{\sigma(t)} \quad (25)$$

So, Eq. (13) is right.

## F. Proof of Spectrum Autoregressive

**Lemma 1.** For a linear flow-matching noise scheduler  $\{\alpha_t = t, \sigma_t = 1 - t\}$ , let us denote  $K_{freq}$  as the maximum frequency of the clean data  $\mathbf{x}_{data}$ ,  $\mathcal{R}(\mathbf{x})[f_{max}]$  as the spectral power of  $f_{max}$  in  $\mathbf{x}$ . We suppose the power monopoly decreases along with the frequency. The maximum retained frequency satisfies:

$$R(\mathbf{x}_t)[f_{max}(t)] > \left(\frac{t}{1-t}\right)^2 \text{ and } f_{max}(t) < K_{freq}. \quad (26)$$

Given the noise scheduler  $\{\alpha_t, \sigma_t\}$ , the clean data  $\mathbf{x}_{data}$  and Gaussian noise  $\epsilon$ . Denote  $K_{freq}$  as the maximum frequency of the clean data  $\mathbf{x}_{data}$ . The noisy latent  $\mathbf{x}_t$  at timestep  $t$  has been defined as:

$$\mathbf{x}_t = \alpha_t \mathbf{x}_{data} + \sigma_t \epsilon \quad (27)$$

The spectrum magnitude  $c_i$  of  $\mathbf{x}_t$  on DCT basics  $\mathbf{u}_i$  follows:

$$c_i = \mathbb{E}_\epsilon[\mathbf{u}_i^T \mathbf{x}_t]^2$$

$$c_i = \mathbb{E}_\epsilon[\mathbf{u}_i^T (\alpha_t \mathbf{x}_{data} + \sigma_t \epsilon)]^2$$

Recall that the spectrum magnitude of Gaussian noise  $\epsilon$  is uniformly distributed.

*Proof.*

$$c_i = \mathbb{E}_\epsilon[\mathbf{u}_i^T (\alpha_t \mathbf{x}_{data} + \sigma_t \epsilon)]^2 \quad (28)$$

$$c_i = \alpha_t^2 [\mathbf{u}_i^T \mathbf{x}_{data}]^2 + \sigma_t^2 \lambda \quad (29)$$

$$c_i = \alpha_t^2 R(\mathbf{x}_t)[f_i] + \sigma_t^2 \lambda \quad (30)$$

Note that  $\epsilon$  is a standard Gaussian noise, so  $\lambda = 1$ . If  $\alpha_t^2 R(\mathbf{x}_t)[f_i]$  smaller than  $\sigma_t^2$ , the frequency at  $c_i$  will be canceled. Recall that the power monopoly decreases along with the frequency. Thus, the spectral power of  $f_{max}$  needs to satisfy:

$$\alpha_t^2 R(\mathbf{x}_t)[f_{max}] > \sigma_t^2 \quad (31)$$

$$R(\mathbf{x}_t)[f_{max}] > \frac{\sigma_t^2}{\alpha_t^2} \quad (32)$$

$$R(\mathbf{x}_t)[f_{max}] > \left(\frac{1-t}{t}\right)^2 \quad (33)$$

□

**Lemma 2.** The spectrum magnitude  $R(f)$  of a specific frequency  $f$  on general nature signals follows:

$$R(f) = c \cdot f^{-\beta} \quad (34)$$

where,  $c$  is a positive numbers and  $\beta \approx 2$  in 2-dimension data.

Then, we can obtain the max remaining frequency changes along with timesteps  $t$ .

$$c \cdot f_{max}(t)^{-\beta} > \left(\frac{1-t}{t}\right)^2 \quad (35)$$

$$f_{max}(t) > \left(\frac{1}{c}\right)^{-\frac{1}{\beta}} \left(\frac{t}{1-t}\right) \quad (36)$$

It is clear that when approach to clean data ( $t$  to 1.0), the residual frequency  $\frac{df_{max}(t)}{dt}$  increase.

## G. Linear multisteps method

We conduct targeted experiment on SiT-XL/2 with Adams–Bashforth like linear multistep solver; To clarify, we did not employ this powerful solver for our DDT models in all tables across the main paper.

The reverse ode of the diffusion models tackles the following integral:

$$\mathbf{x}_{i+1} = \mathbf{x}_i + \int_{t_i}^{t_{i+1}} \mathbf{v}_\theta(\mathbf{x}_t, t) dt \quad (37)$$

The classic Euler method employs  $\mathbf{v}_\theta(\mathbf{x}_i, t_i)$  as an estimate of  $\mathbf{v}_\theta(\mathbf{x}_t, t)$  throughout the interval  $[t_i, t_{i+1}]$

$$\mathbf{x}_{i+1} = \mathbf{x}_i + (t_{i+1} - t_i) \mathbf{v}_\theta(\mathbf{x}_i, t_i). \quad (38)$$

The most classic multi-step solver Adams–Bashforth method (deemed as Adams for brevity) incorporates the Lagrange polynomial to improve the estimation accuracy with previous predictions.

$$\begin{aligned} \mathbf{v}_\theta(\mathbf{x}_t, t) &= \sum_{j=0}^i \left( \prod_{k=0, k \neq j}^i \frac{t - t_k}{t_j - t_k} \right) \mathbf{v}_\theta(\mathbf{x}_j, t_j) \\ \mathbf{x}_{i+1} &\approx \mathbf{x}_i + \int_{t_i}^{t_{i+1}} \sum_{j=0}^i \left( \prod_{k=0, k \neq j}^i \frac{t - t_k}{t_j - t_k} \right) \mathbf{v}_\theta(\mathbf{x}_j, t_j) dt \\ \mathbf{x}_{i+1} &\approx \mathbf{x}_i + \sum_{j=0}^i \mathbf{v}_\theta(\mathbf{x}_j, t_j) \int_{t_i}^{t_{i+1}} \left( \prod_{k=0, k \neq j}^i \frac{t - t_k}{t_j - t_k} \right) dt \end{aligned}$$

Note that  $\int_{t_i}^{t_{i+1}} \left( \prod_{k=0, k \neq j}^i \frac{t - t_k}{t_j - t_k} \right) dt$  of the Lagrange polynomial can be pre-integrated into a constant coefficient, resulting in only naive summation being required for ODE solving.

## H. Classifier free guidance.

As classifier-free guidance significantly impacts the performance of diffusion models. Traditional classifier-free guidance improves performance at the cost of decreased diversity. Interval guidance is recently been adopted by REPA[4] and Causalfusion[1], It applies classifier-free guidance only to the high-frequency generation phase to preserve the diversity. We sweep different classifier-free guidance strength with selected intervals. Our DDT-XL/2 achieves the best performance with interval [0.3, 1] with a classifier-free guidance of 2. Recall that we donate  $t = 0$  as the pure noise timestep while REPA[4] use  $t = 1$ , thus this exactly correspond to the [0, 0.7] interval in REPA[4]

## References

- [1] Chaorui Deng, Deyao Zh, Kunchang Li, Shi Guan, and Haoqi Fan. Causal diffusion transformers for generative modeling. *arXiv preprint arXiv:2412.12095*, 2024. 3
- [2] Prafulla Dhariwal and Alexander Nichol. Diffusion models beat gans on image synthesis. *Advances in neural information processing systems*, 34:8780–8794, 2021. 1
- [3] Diederik P Kingma and Jimmy Ba. Adam: A method for stochastic optimization. *arXiv preprint arXiv:1412.6980*, 2014. 1
- [4] Sihyun Yu, Sangkyung Kwak, Huiwon Jang, Jongheon Jeong, Jonathan Huang, Jinwoo Shin, and Saining Xie. Representation alignment for generation: Training diffusion transformers is easier than you think. *arXiv preprint arXiv:2410.06940*, 2024. 3

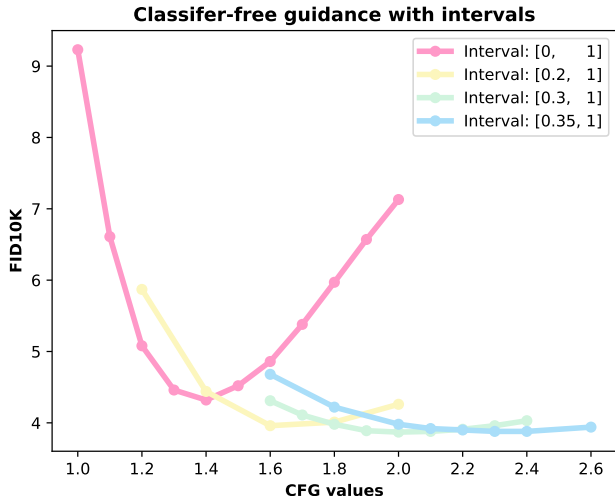

Figure 1. **FID10K of DDT-XL/2 with different Classifier free guidance strength and guidance intervals.** We sweep different classifier-free guidance strength with selected intervals. Our DDT-XL/2 achieves the best performance with interval [0.3, 1] with a classifier-free guidance of 2.
